# Supplementary material for: Milk fat globule membranes ameliorate diet-induced obesity in mice by modulating glucolipid metabolism, body inflammation, and oxidative stress
Source: Royal Society of Chemistry journal article supplement (doi:10.1039/d4fo04072d), 2024-01-01

## SUPPORTING INFORMATION

### **Milk fat globule membranes ameliorate diet-induced obesity in mice by modulating glucolipid metabolism, body inflammation, and oxidative stress**

Haowen Ji <sup>a, b</sup>, Xiaojun Zhu <sup>a, b</sup>, Jiaxin Qiu <sup>a, b</sup>, Shouwen Zhang <sup>c</sup>, Jiajun Li <sup>d</sup>, Lu Liu <sup>a, b, \*</sup>, Xiaodong Li <sup>a, b, \*</sup>, Muhammad Muneeb <sup>a, b</sup>

<sup>a</sup> Food College, Northeast Agricultural University, No.600 Changjiang St., Xiangfang Dist, 150030, Harbin, China

<sup>b</sup> Key Laboratory of Dairy Science, Ministry of Education, Northeast Agricultural University, No. 600 Changjiang St., Xiangfang Dist, 150030, Harbin, China

<sup>c</sup> Postdoctoral research station of Heilongjiang Yaolan Dairy Technology stock Company Ltd, 150010, Harbin, China

<sup>d</sup> Heilongjiang Yaolan Dairy Technology stock Company Ltd, 150010, Harbin, China

#### **\*Corresponding author:**

Lu Liu

E-mail: liulu89824@163.com

Xiaodong Li

E-mail: hrblxd@163.com

### Raw images of western blot in Figure 4

| Number | 1   | 2   | 3                 | 4                 |
|--------|-----|-----|-------------------|-------------------|
| Group  | LFD | HFD | MFGM <sub>1</sub> | MFGM <sub>2</sub> |

#### Fas

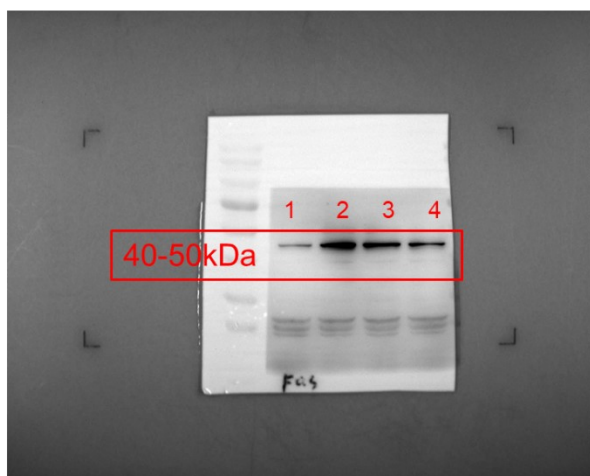

#### $\beta$ -Actin

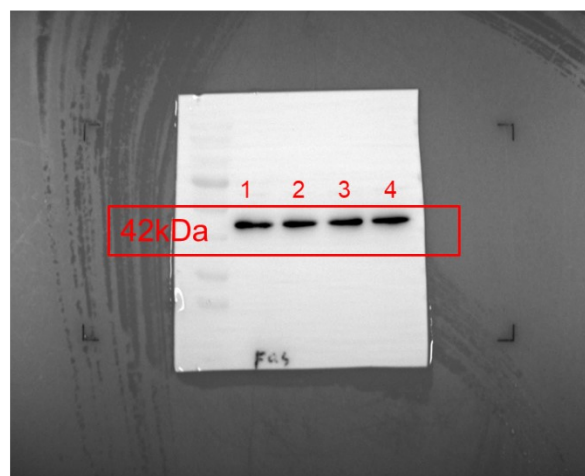

#### Scd1

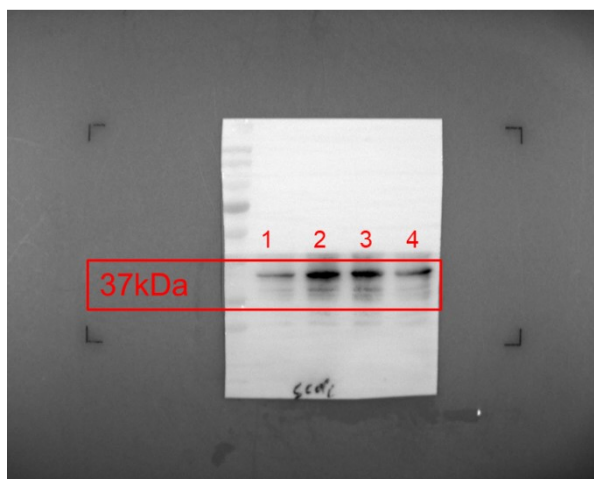

#### $\beta$ -Actin

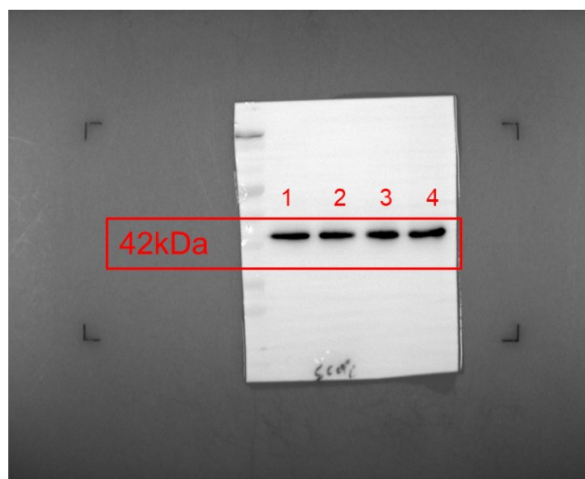

**Cpt-1 $\alpha$**

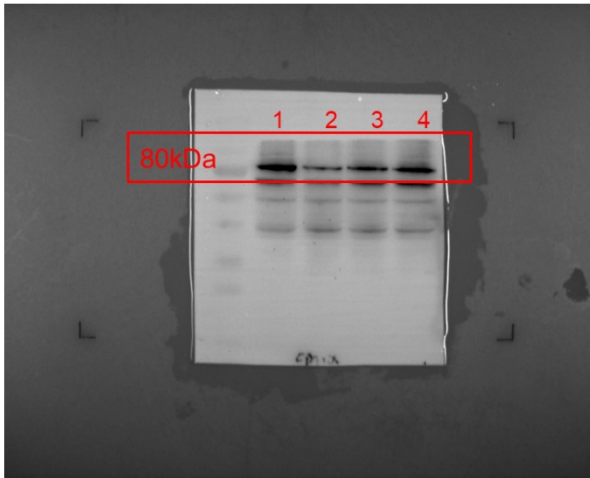

**$\beta$ -Actin**

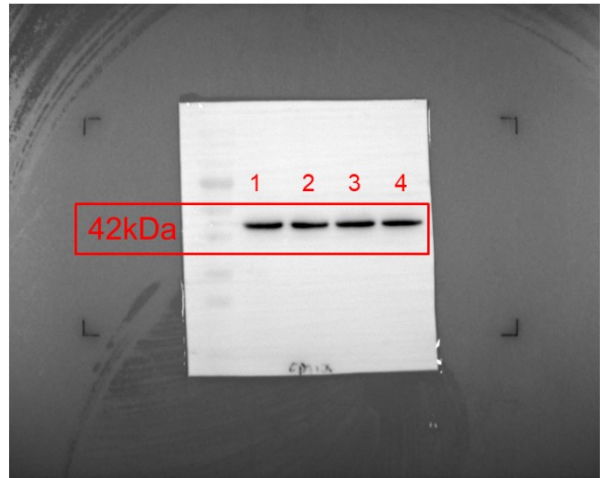

**Mcad**

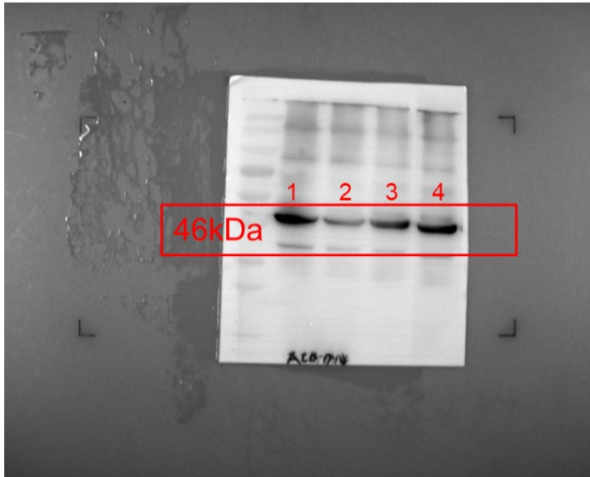

**$\beta$ -Actin**

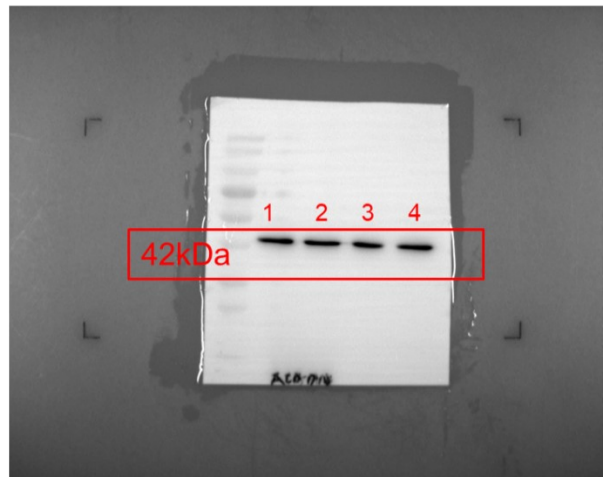

### Raw images of western blot in Figure 5

| Number | 1   | 2   | 3                 | 4                 |
|--------|-----|-----|-------------------|-------------------|
| Group  | LFD | HFD | MFGM <sub>1</sub> | MFGM <sub>2</sub> |

#### G6pase

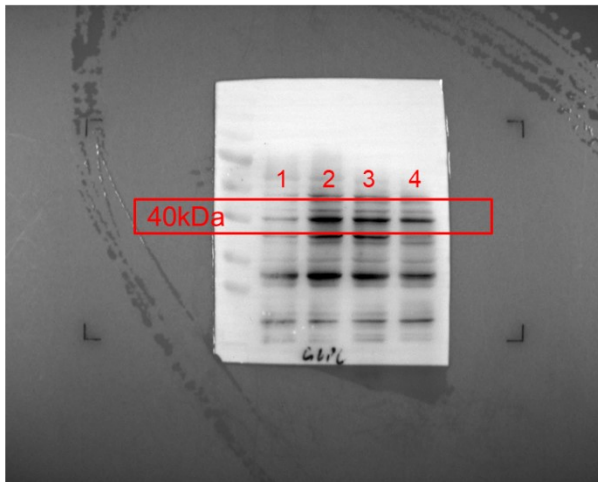

#### $\beta$ -Actin

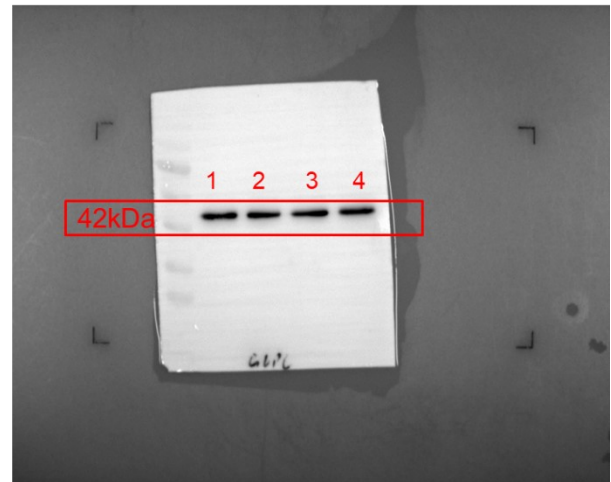

#### PEPCK

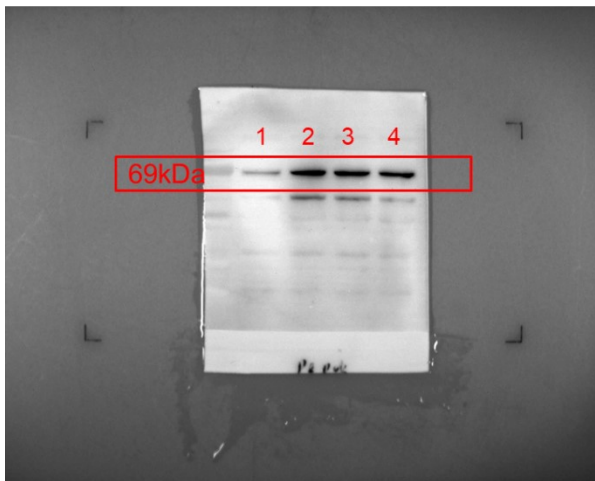

#### $\beta$ -Actin

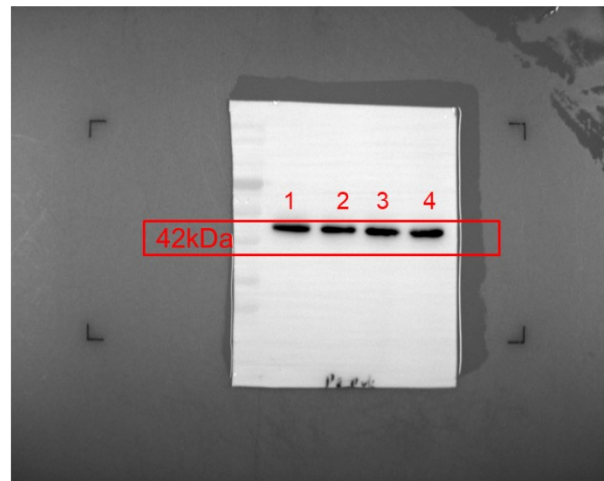

### Raw images of western blot in Figure 8

| Number | 1   | 2   | 3                 | 4                 |
|--------|-----|-----|-------------------|-------------------|
| Group  | LFD | HFD | MFGM <sub>1</sub> | MFGM <sub>2</sub> |

**IL-6**

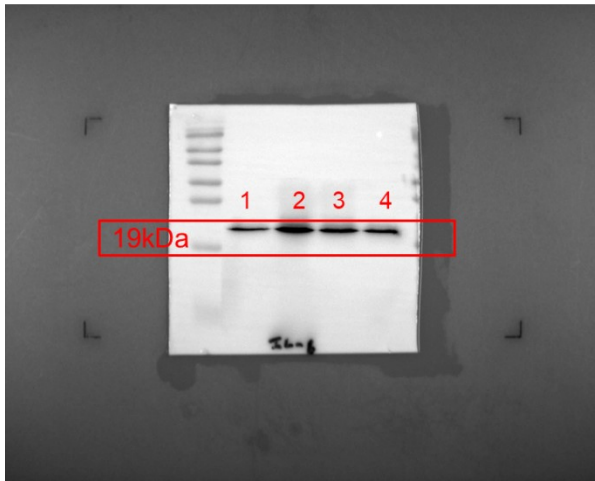

**$\beta$ -Actin**

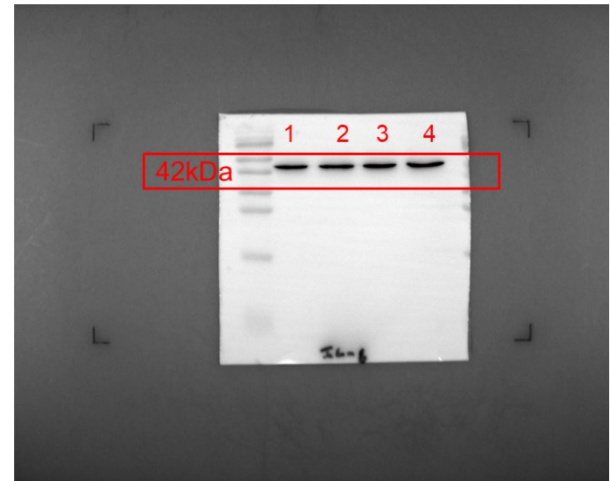

**TNF- $\alpha$**

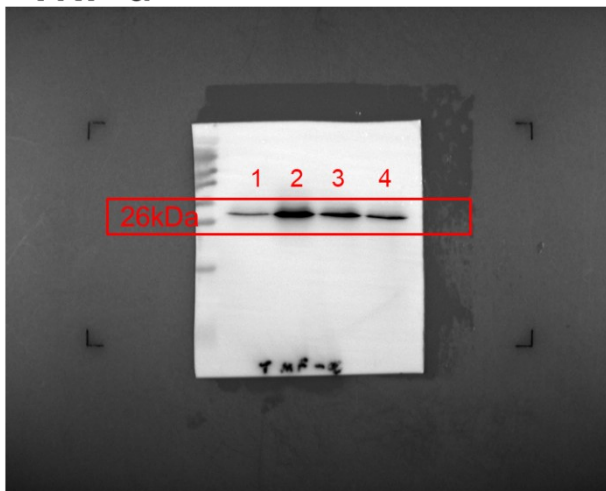

**$\beta$ -Actin**

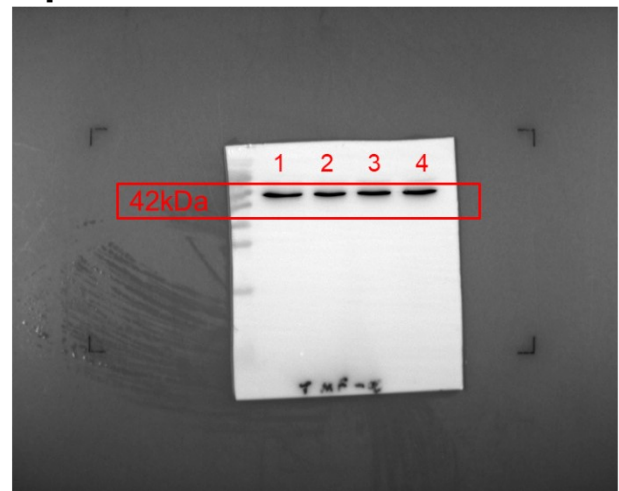

Supplement: d4fo04072d1.pdf [file d4fo04072d1.pdf]
